# Supplementary material for: Novel DYRK1A Inhibitor Rescues Learning and Memory Deficits in a Mouse Model of Down Syndrome
Source: MDPI journal article supplement (doi:10.3390/ph14111170), 2021-11-17
Supplement: s1 [file s1]

# Novel DYRK1A Inhibitor Rescues Learning and Memory Deficits in a Mouse Model of Down Syndrome

Wenche Stensen <sup>1,2</sup>, Ulli Rothweiler <sup>1,2</sup>, Richard Alan Engh <sup>1</sup>, Melissa R. Stasko <sup>3</sup>, Ilya Bederman <sup>3</sup>, Alberto C. S. Costa <sup>3</sup>, Anders Fugelli <sup>2</sup> and John S. Mj en Svendsen <sup>1,2,\*</sup>

<sup>1</sup> Department of Chemistry, UiT, The Arctic University of Norway, 9037 Troms , Norway; wenche.stensen@uit.no (W.S.); ulli.rothweiler@uit.no (U.R.); richard.ENGH@uit.no (R.A.E.)

<sup>2</sup> Pharmasum Therapeutics AS, Gaustadalleen 21, 0349 Oslo, Norway; afugelli@pharmasum.com

<sup>3</sup> Departments of Pediatrics, Psychiatry, Macromolecular Science and Engineering, Case Western Reserve University, 11100 Euclid Avenue, Cleveland, OH 44106-6090, USA; mxs1081@case.edu (M.R.S.); irb2@case.edu (I.B.); alberto.costa@case.edu (A.C.S.C.)

\* Correspondence: john-sigurd.svendsen@uit.no

## Preparation of PST-001

### 1-(3-Methoxyphenyl)thiourea

A mixture of sodium thiocyanate (49.38 g, 609 mmol) in isopropyl acetate (400 ml) was added m-anisidine (45.6 ml, 406 mmol) at room temperature. TFA (78 ml, 1019 mmol) was then added dropwise slowly ensuring that the temperature of the reaction mixture was maintained at 40  C or less. After complete addition the reaction mixture was stirred at 85  C for 16.5 hrs. The mixture was cooled to room temperature and HPLC-water (50 ml) was added before further cooling to 0  C. The crude product was isolated by vacuum filtration on a sintered glass funnel and washed with HPLC-water (50 ml) and dried under reduced pressure to afford 60.5 g (82 %) of the crude title compound as a colorless powder which was used in the next step without further purification.

<sup>1</sup>H NMR (300 MHz, DMSO-*d*<sub>6</sub>)   9.68 (s, 1H), 7.48 (bs, 2H), 7.22 (t, *J* = 8.1, 1H), 7.12 (s, 1H), 6.92 (d, *J* = 8.0, 1H), 6.69 (dd, *J* = 8.3, 1.7, 1H), 3.73 (s, 3H).

MS (pos): 205 (M+Na), 183 (M+H)

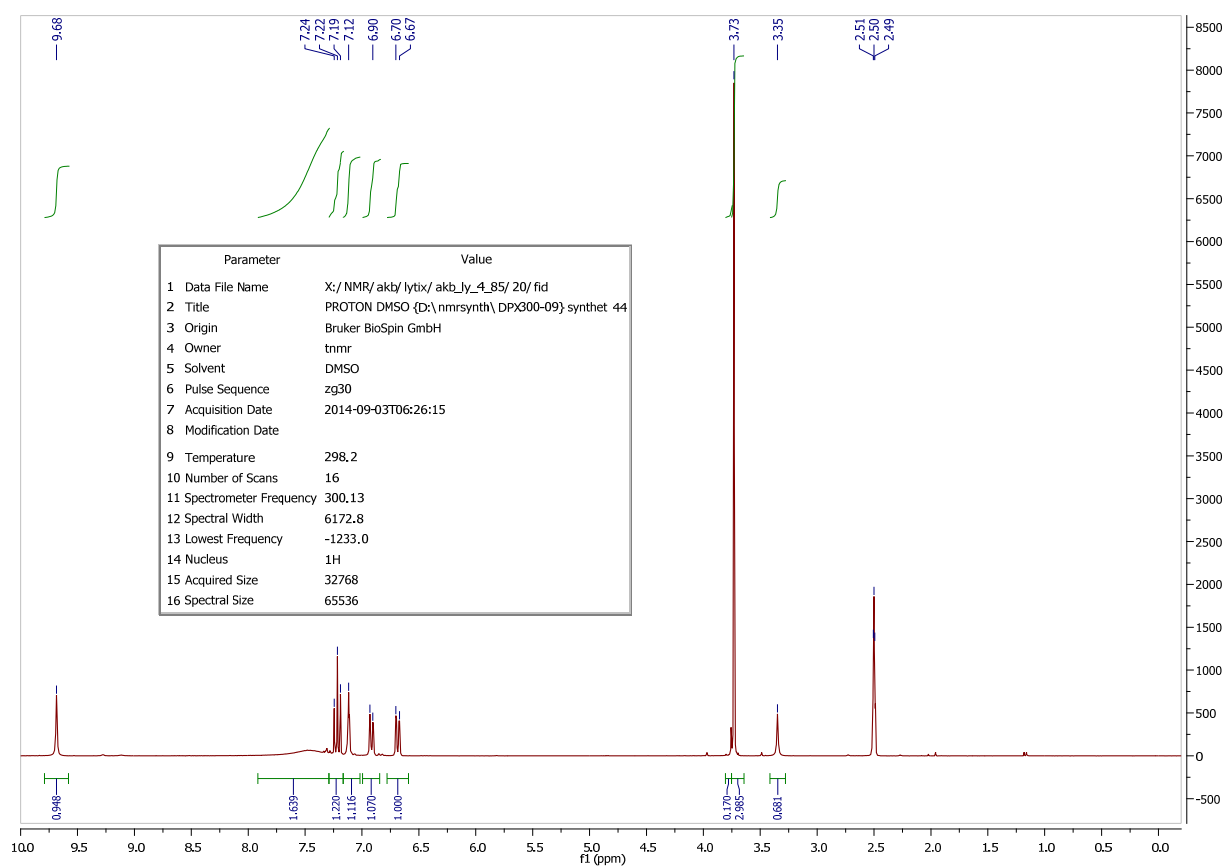

**Figure S1.**  $^1\text{H}$  NMR spectrum (DMSO- $d_6$ ) of 1-(3-Methoxyphenyl)thiourea.

## 5-Methoxybenzo[d]thiazol-2-amine

A suspension of 1-(3-methoxyphenyl)thiourea (60.39 g, 331.4 mmol) and LiBr (43.24 g, 497.9 mmol) in acetic acid (600 ml) was added Br<sub>2</sub> (17 ml, 330.8 mmol) slowly drop wise / portion wise ensuring that the temperature of the reaction mixture was maintained at 33 °C or less. After complete addition the reaction mixture was stirred at 40 °C for 18.5 hrs. The reaction mixture was cooled to 0 °C before the crude product was isolated by vacuum filtration on a sintered glass funnel and washed with 5 % Na<sub>2</sub>CO<sub>3</sub> (aq) (4 x 100 ml) and HPLC-water (100 ml x 2) and dried under reduced pressure to afford 31.72 g of the crude title compound as a colorless powder. The washings were added 2 M NaOH (aq) to pH ~ 11 and extracted with CH<sub>2</sub>Cl<sub>2</sub> (3 x 500 ml), dried (Na<sub>2</sub>SO<sub>4</sub>), filtered and concentrated to afford additional 7.22 g of the impure title compound. The concentrated extracts were purified by flash-chromatography on silica gel (400 g) eluting with CH<sub>2</sub>Cl<sub>2</sub> – CH<sub>2</sub>Cl<sub>2</sub> (100:2) to afford 4.02 g of the title compound. Total yield 35.74 g (60 %).

<sup>1</sup>H NMR (400 MHz, DMSO-*d*<sub>6</sub>) δ 7.56 (bs, 2H), 7.50 (d, *J* = 8.6, 1H), 6.92 (d, *J* = 2.5, 1H), 6.65 (dd, *J* = 8.6, 2.5, 1H), 3.75 (s, 3H).

MS (pos): 181 (M+H)

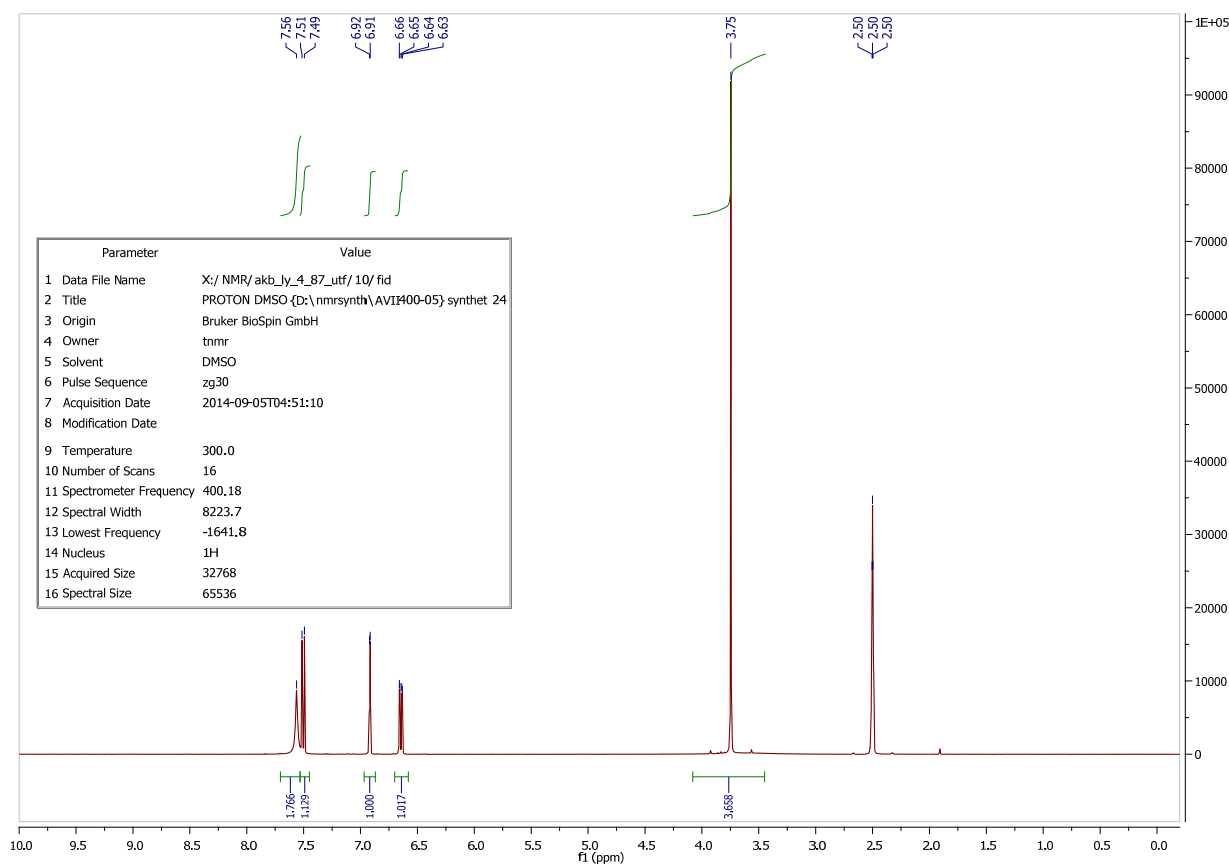

Figure S2. <sup>1</sup>H NMR spectrum (DMSO-*d*<sub>6</sub>) of 5-Methoxybenzo[d]thiazol-2-amine.

## 5-Methoxybenzo[d]thiazole

A mixture of 5-methoxybenzo[d]thiazol-2-amine (35.69 g, 198 mmol) in dry DMF (290 ml) was added drop wise over 55 minutes to a solution of *t*-butyl nitrite (42 ml, 353 mmol) at 65 °C. The reaction mixture was stirred at 65 °C for 40 minutes, cooled to room temperature and poured into 1 M HCl (1 L). The mixture was extracted with EtOAc (4 x 500 ml), dried (Na<sub>2</sub>SO<sub>4</sub>), filtered and concentrated under reduced pressure. Dry-flash chromatography on silica gel (1 kg) eluting with heptane – heptane:EtOAc (80:20) afforded 14.09 g (43 %) of the title compound as a yellow oil with some solidified material.

<sup>1</sup>H NMR (300 MHz, CDCl<sub>3</sub>) δ 8.95 (s, 1H), 7.78 (d, *J* = 8.8, 1H), 7.59 (d, *J* = 2.5, 1H), 7.08 (dd, *J* = 8.7, 2.3, 1H), 3.88 (s, 3H).

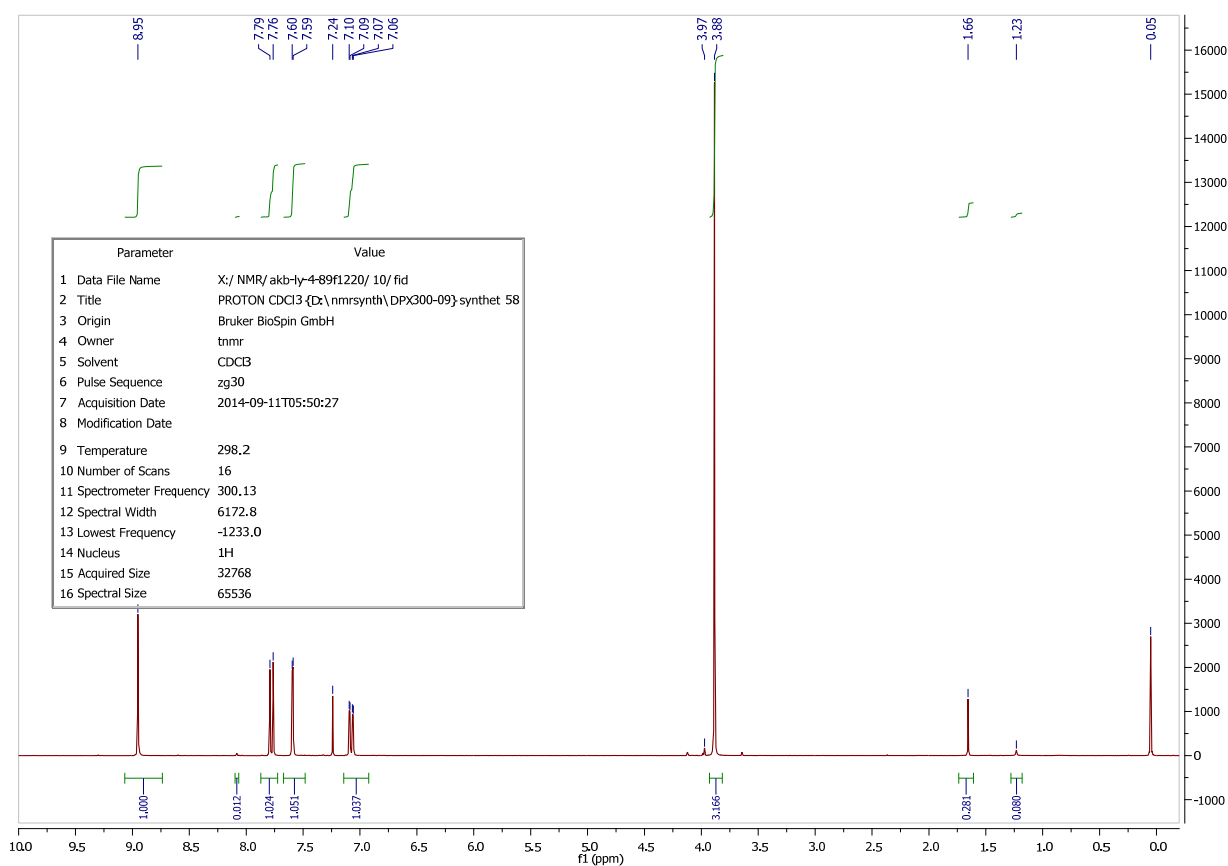

Figure S3. <sup>1</sup>H NMR spectrum (CDCl<sub>3</sub>) of 5-Methoxybenzo[d]thiazole.

### 5-(5-methoxybenzo[d]thiazol-2-yl)pyridin-3-amine (1)

5-Methoxybenzothiazole (6.34 g, 38.4 mmol), 3-amino-5-bromopyridine (7.41 g, 42.8 mmol), cesium carbonate (12.5 g, 38.4 mmol), copper(I)bromide (1.12 g) and Pd(OAc)<sub>2</sub> (0.56 g, 2.50 mmol) were suspended in dry DMF (200 ml) under argon. P(*t*-Bu)<sub>3</sub> (1.00 g, 4.94 mmol) dissolved in 10 ml dry DMF was added. The reaction mixture was heated at 150 °C for 1.5 hrs, cooled to room temperature and poured into EtOAc (100 ml). The organic phase was washed with water (100 ml) and the aqueous phase extracted with EtOAc (2 x 100 ml). The combined organic phase was washed with water, dried (MgSO<sub>4</sub>), filtered and concentrated. Flash chromatography (Heptane : EtOAc 80 : 20 – 50 : 50 – EtOAc) afforded 4.09 g (41%) of the title compound as a pale yellow solid.

<sup>1</sup>H NMR (300 MHz, DMSO-*d*<sub>6</sub>) δ 8.39 (s, 1H), 8.08 (s, 1H), 8.01 (d, *J* = 8.8, 1H), 7.73 – 7.49 (m, 2H), 7.11 (dd, *J* = 8.8, 2.5, 1H), 5.71 (s, 2H), 3.87 (s, 3H).

MS (pos): 258 (M+H)

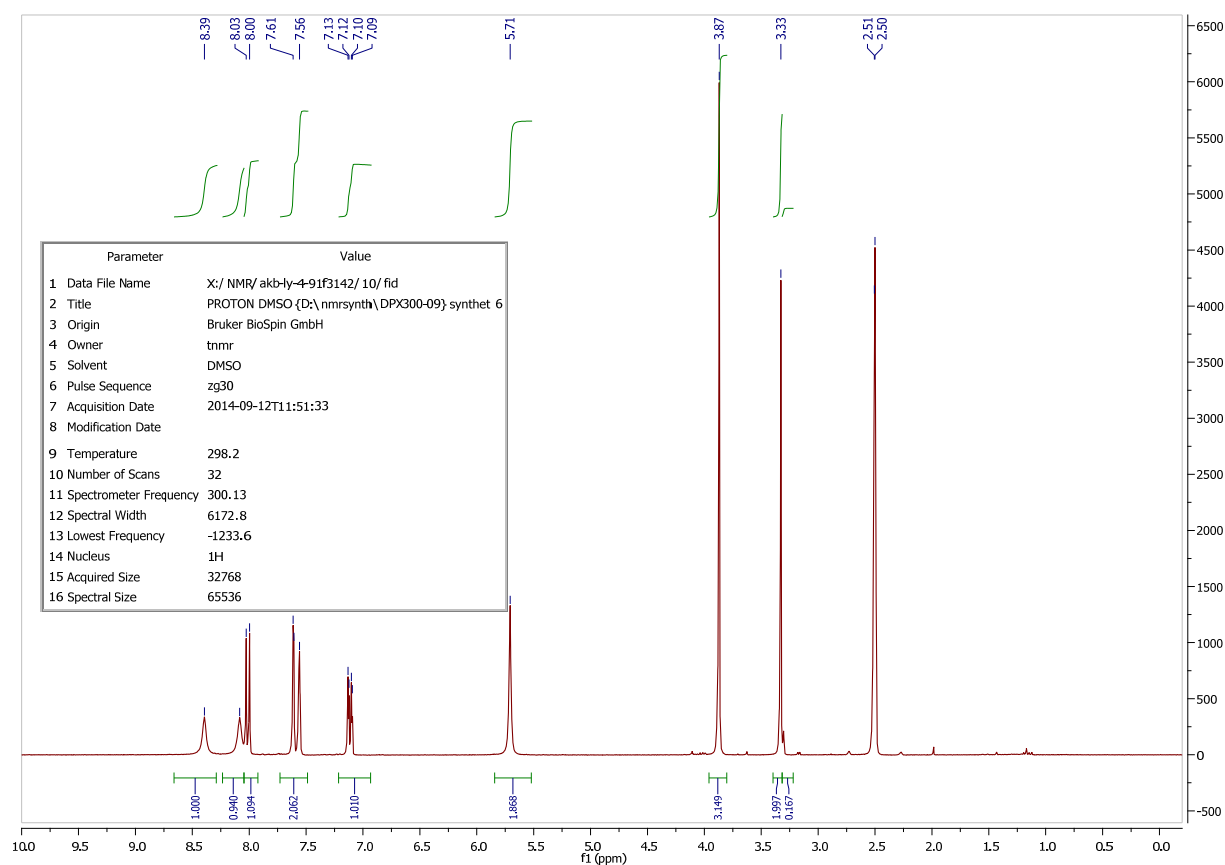

Figure S4. <sup>1</sup>H NMR spectrum (DMSO-*d*<sub>6</sub>) of 5-(5-methoxybenzo[d]thiazol-2-yl)pyridin-3-amine (1).

### ***N*-(5-(5-Methoxybenzo[d]thiazol-2-yl)pyridin-3-yl)acetamide (PST-001)**

To a suspension of 5-(5-methoxybenzo[d]thiazol-2-yl)pyridin-3-amine (1.29 g, 5.00 mmol) in DCM (25 ml) was added pyridine (10 ml), followed by acetic anhydride (0.95 ml, 10.0 mmol). The reaction mixture was stirred at room temperature overnight, poured into water (100 ml) and the aqueous phase extracted with CHCl<sub>3</sub> : MeOH (90:10) (3 × 100 ml). The combined organic extract was dried (Na<sub>2</sub>SO<sub>4</sub>), filtered and concentrated. The crude material was treated with EtOAc (75 ml), sonicated for 2 minutes and filtered. Drying allowed the isolation of 1.30 gram (73%) of the title compound as a beige solid from 1.54 g substrate.

<sup>1</sup>H NMR (400 MHz, DMSO-*d*<sub>6</sub>) δ 10.41 (s, 1H), 8.88 (s, 1H), 8.80 (s, 1H), 8.03 (d, *J* = 8.8, 1H), 7.66 (d, *J* = 2.3, 1H), 7.13 (dd, *J* = 8.8, 2.4, 1H), 3.87 (s, 3H), 2.13 (s, 3H).

MS (pos): 322 (M+Na).

HPLC (234 nm): 99.5 % (area-%).

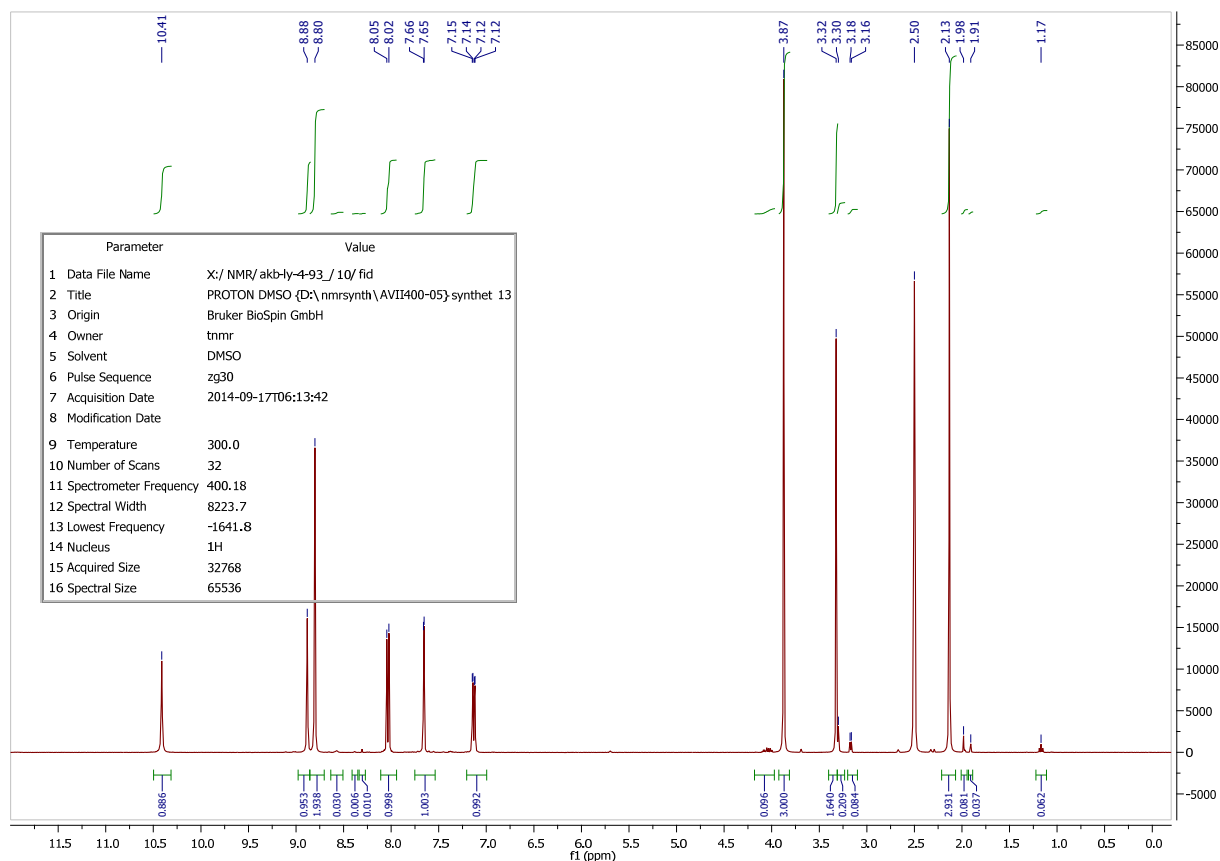

**Figure S5.** <sup>1</sup>H NMR spectrum (DMSO-*d*<sub>6</sub>) of *N*-(5-(5-Methoxybenzo[d]thiazol-2-yl)pyridin-3-yl)acetamide (**PST-001**).

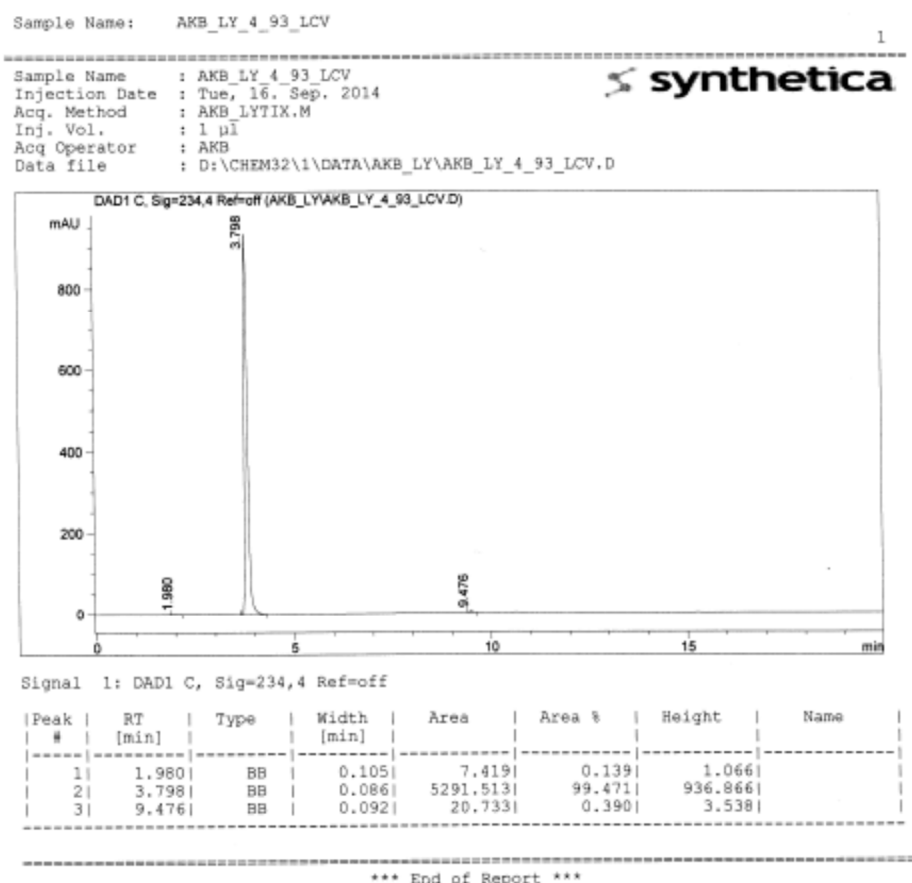

**Figure S6.** HPLC-chromatogram of *N*-(5-(5-Methoxybenzo[d]thiazol-2-yl)pyridin-3-yl)acetamide (**PST-001**) showing a purity of >99%.

## DYRK1A protein production and crystallization

**Table S1.** Crystallographic data and model statistics for 6YF8

|                         |                                               |
|-------------------------|-----------------------------------------------|
| Compound                | <b>PST001</b>                                 |
| PDB                     | 6YF8                                          |
| <b>DATA COLLECTION</b>  |                                               |
| Synchrotron radiation   | BESSY II 14.2                                 |
| Detector                | Pilatus                                       |
| Wavelength, Å           | 0.918400                                      |
| Number of frames        | 1800                                          |
| Oscillation range/frame | 0.1                                           |
| <b>DIFFRACTION DATA</b> |                                               |
| Space group             | P2 <sub>1</sub> 2 <sub>1</sub> 2 <sub>1</sub> |
| Unit cell parameters, Å | 88.0 88.04 229.72                             |
| Protein molecules in AU | 4                                             |

|                                               |                         |
|-----------------------------------------------|-------------------------|
| Number of reflections                         | 200855                  |
| Unique reflections                            | 30124                   |
| Resolution range , Å (final shell)            | 50.0 - 3.2 (3.39 - 3.2) |
| Completeness (final shell) %                  | 99.3 (98.4)             |
| I/σ (final shell)                             | 7.02 (1.36)             |
| R factor observed %                           | 26.8 (130.9)            |
| CC1/2 (final shell)                           | 99.1 (58.6)             |
| <b>REFINEMENT</b>                             |                         |
| Resolution limits, Å                          | 48.3 - 3.2              |
| Number of used reflections                    | 30122                   |
| Data completeness                             | 99.37                   |
| Percentage of free reflections                | 4.8                     |
| Number of protein atoms                       | 10930                   |
| Number of heterogen atoms                     | 84                      |
| Number of water                               | 0                       |
| R factor overall/free                         | 0.25 / 0.28             |
| Wilson B-factor (Å <sup>2</sup> )             | 66.8                    |
| RMS bonds/angles                              | 0.003/0.75              |
| Ramachandran (favored / allowed / outliers %) | 95 / 4.4 / 0.6          |

**Table S2.** Remaining protein kinase activity after exposure to **PST-001** and compound **1**. Two concentrations of the inhibitor were used, 100 and 1 μM.

| Compounds                 | <b>PST-001</b> |     | <b>1</b> |     |
|---------------------------|----------------|-----|----------|-----|
|                           | 100            | 1   | 100      | 1   |
| Tested concentration (μM) | 100            | 1   | 100      | 1   |
| MKK1                      | 135            | 117 | 84       | 101 |
| MKK2                      | 100            | 75  | 62       | 81  |
| MKK6                      | 115            | 140 | 118      | 120 |
| ERK1                      | 108            | 109 | 81       | 99  |
| ERK2                      | 112            | 115 | 96       | 102 |
| ERK5                      | 51             | 72  | 37       | 66  |
| JNK1                      | 130            | 113 | 94       | 112 |
| JNK2                      | 129            | 126 | 104      | 123 |
| JNK3                      | 122            | 127 | 61       | 125 |
| p38a MAPK                 | 106            | 110 | 96       | 103 |
| p38b MAPK                 | 115            | 107 | 101      | 119 |
| p38g MAPK                 | 105            | 125 | 37       | 110 |

| Compounds                 | <b>PST-001</b> |     | <b>1</b> |     |
|---------------------------|----------------|-----|----------|-----|
|                           | 100            | 1   | 100      | 1   |
| Tested concentration (μM) | 100            | 1   | 100      | 1   |
| p38d MAPK                 | 112            | 115 | 95       | 116 |
| ERK8                      | 28             | 89  | 4        | 86  |
| RSK1                      | 88             | 99  | 42       | 99  |
| RSK2                      | 100            | 113 | 56       | 115 |
| PDK1                      | 105            | 110 | 67       | 104 |
| PKBa                      | 106            | 116 | 72       | 120 |
| PKBb                      | 98             | 112 | 15       | 123 |
| SGK1                      | 82             | 102 | 62       | 99  |
| S6K1                      | 81             | 113 | 58       | 118 |
| PKA                       | 88             | 88  | 74       | 98  |
| ROCK 2                    | 64             | 110 | 5        | 108 |
| PRK2                      | 101            | 102 | 74       | 103 |



| Compounds                 | PST-001 |     | 1   |     |
|---------------------------|---------|-----|-----|-----|
|                           | 100     | 1   | 100 | 1   |
| Tested concentration (μM) | 100     | 1   | 100 | 1   |
| PKCa                      | 85      | 119 | 63  | 110 |
| PKCγ                      | 124     | 125 | 61  | 115 |
| PKCz                      | 124     | 119 | 128 | 106 |
| PKD1                      | 92      | 103 | 23  | 94  |
| STK33                     | 112     | 113 | 57  | 111 |
| MSK1                      | 64      | 104 | 60  | 109 |
| MNK1                      | 94      | 111 | 20  | 97  |
| MNK2                      | 66      | 106 | 27  | 90  |
| MAPKAP-K2                 | 111     | 109 | 66  | 122 |
| MAPKAP-K3                 | 113     | 115 | 74  | 115 |
| PRAK                      | 116     | 114 | 36  | 128 |
| CAMKKb                    | 54      | 104 | 37  | 107 |
| CAMK1                     | 100     | 107 | 52  | 99  |
| SmMLCK                    | 99      | 118 | 41  | 98  |
| PHK                       | 83      | 107 | 52  | 101 |
| DAPK1                     | 101     | 114 | 58  | 103 |
| CHK1                      | 115     | 104 | 86  | 101 |
| CHK2                      | 85      | 105 | 52  | 114 |
| GSK3b                     | 100     | 107 | 25  | 107 |
| CDK2-Cyclin A             | 69      | 110 | 19  | 96  |
| CDK9-Cyclin T1            | 120     | 122 | 83  | 113 |
| PLK1                      | 115     | 112 | 73  | 99  |
| Aurora A                  | 136     | 133 | 97  | 132 |
| Aurora B                  | 24      | 106 | 21  | 107 |
| TLK1                      | 134     | 129 | 115 | 131 |
| LKB1                      | 150     | 123 | 161 | 109 |
| AMPK (hum)                | 69      | 99  | 46  | 107 |
| MARK1                     | 110     | 122 | 69  | 122 |
| MARK2                     | 106     | 116 | 62  | 112 |
| MARK3                     | 95      | 99  | 34  | 98  |
| MARK4                     | 103     | 121 | 58  | 131 |
| BRSK1                     | 111     | 114 | 37  | 115 |
| BRSK2                     | 125     | 128 | 53  | 125 |
| MELK                      | 44      | 99  | 12  | 96  |
| NUAK1                     | 107     | 130 | 35  | 112 |

| Compounds                 | PST-001 |     | 1   |     |
|---------------------------|---------|-----|-----|-----|
|                           | 100     | 1   | 100 | 1   |
| Tested concentration (μM) | 100     | 1   | 100 | 1   |
| SIK2                      | 65      | 112 | 10  | 102 |
| SIK3                      | 78      | 114 | 19  | 106 |
| TSSK1                     | 114     | 124 | 70  | 107 |
| CK1γ2                     | 101     | 114 | 24  | 108 |
| CK1δ                      | 59      | 99  | 13  | 107 |
| CK2                       | 95      | 102 | 21  | 103 |
| TTBK1                     | 110     | 109 | 90  | 109 |
| TTBK2                     | 117     | 119 | 103 | 123 |
| DYRK1A                    | 3       | 8   | 0   | 7   |
| DYRK2                     | 4       | 21  | 1   | 11  |
| DYRK3                     | 5       | 20  | 2   | 14  |
| NEK2a                     | 107     | 119 | 51  | 111 |
| NEK6                      | 113     | 112 | 115 | 106 |
| IKKb                      | 108     | 111 | 38  | 105 |
| IKKe                      | 122     | 105 | 55  | 110 |
| TBK1                      | 104     | 119 | 60  | 105 |
| PIM1                      | 32      | 98  | 24  | 87  |
| PIM2                      | 102     | 120 | 36  | 110 |
| PIM3                      | 76      | 93  | 24  | 90  |
| SRPK1                     | 108     | 115 | 55  | 108 |
| EF2K                      | 106     | 113 | 84  | 112 |
| EIF2AK3                   | 118     | 123 | 84  | 122 |
| HIPK1                     | 113     | 113 | 36  | 116 |
| HIPK2                     | 77      | 90  | 10  | 79  |
| HIPK3                     | 100     | 123 | 28  | 120 |
| CLK2                      | 5       | 22  | 1   | 23  |
| PAK2                      | 122     | 114 | 103 | 110 |
| PAK4                      | 98      | 116 | 54  | 109 |
| PAK5                      | 129     | 113 | 70  | 111 |
| PAK6                      | 113     | 112 | 80  | 108 |
| MST2                      | 54      | 120 | 32  | 124 |
| MST3                      | 113     | 118 | 96  | 114 |
| MST4                      | 113     | 112 | 72  | 101 |
| GCK                       | 123     | 118 | 28  | 105 |
| MAP4K3                    | 94      | 111 | 22  | 98  |

| Compounds                 | PST-001 |     | 1   |     |
|---------------------------|---------|-----|-----|-----|
| Tested concentration (μM) | 100     | 1   | 100 | 1   |
| MAP4K5                    | 92      | 82  | 61  | 106 |
| MINK1                     | 88      | 104 | 36  | 108 |
| MEKK1                     | 109     | 126 | 107 | 132 |
| MLK1                      | 96      | 108 | 16  | 106 |
| MLK3                      | 60      | 109 | 29  | 101 |
| TESK1                     | 85      | 105 | 28  | 110 |
| TAO1                      | 111     | 102 | 57  | 97  |
| ASK1                      | 131     | 114 | 150 | 116 |
| TAK1                      | 63      | 48  | 6   | 70  |
| IRAK1                     | 93      | 103 | 24  | 95  |
| IRAK4                     | 32      | 88  | 18  | 85  |
| RIPK2                     | 20      | 109 | 20  | 104 |
| OSR1                      | 136     | 120 | 111 | 128 |
| TTK                       | 69      | 88  | 47  | 86  |
| MPSK1                     | 113     | 121 | 106 | 110 |
| WNK1                      | 118     | 127 | 113 | 116 |
| ULK1                      | 120     | 129 | 77  | 116 |
| ULK2                      | 119     | 111 | 50  | 101 |
| TGFBR1                    | 129     | 112 | 118 | 105 |
| Src                       | 106     | 100 | 42  | 123 |
| Lck                       | 100     | 93  | 52  | 106 |
| CSK                       | 126     | 121 | 78  | 116 |
| YES1                      | 128     | 130 | 58  | 122 |

| Compounds                 | PST-001 |     | 1   |     |
|---------------------------|---------|-----|-----|-----|
| Tested concentration (μM) | 100     | 1   | 100 | 1   |
| ABL                       | 99      | 97  | 46  | 108 |
| BTK                       | 86      | 92  | 31  | 101 |
| JAK2                      | 125     | 123 | 55  | 117 |
| SYK                       | 58      | 112 | 38  | 113 |
| ZAP70                     | 131     | 123 | 63  | 119 |
| TIE2                      | 133     | 129 | 85  | 135 |
| BRK                       | 106     | 106 | 50  | 94  |
| EPH-A2                    | 119     | 124 | 90  | 112 |
| EPH-A4                    | 106     | 117 | 85  | 89  |
| EPH-B1                    | 108     | 117 | 91  | 122 |
| EPH-B2                    | 125     | 137 | 96  | 136 |
| EPH-B3                    | 130     | 147 | 71  | 130 |
| EPH-B4                    | 130     | 107 | 97  | 112 |
| FGF-R1                    | 107     | 107 | 91  | 110 |
| HER4                      | 94      | 103 | 16  | 104 |
| IGF-1R                    | 104     | 104 | 68  | 96  |
| IR                        | 120     | 116 | 45  | 108 |
| IRR                       | 120     | 117 | 77  | 113 |
| TrkA                      | 45      | 111 | 33  | 104 |
| DDR2                      | 80      | 98  | 49  | 107 |
| VEG-FR                    | 41      | 111 | 20  | 110 |
| PDGFRA                    | 73      | 100 | 26  | 101 |
| PINK                      | 118     | 119 | 114 | 121 |
